# Supplementary material
Source: PubMed Central journal article supplement (PMC5648585)
Supplement: NIHMS910162-supplement-supplement_1.pdf [file NIHMS910162-supplement-supplement_1.pdf]

**Supplemental Table 1:** List of significantly up-regulated miRNAs in the cumulus cell samples of poor responder patients compared to non-poor responders. The miRNAs are listed in descending order based on fold change value.

| miRNA             | Probe Set              | log2 expression<br>(non-poor responders) | log2 expression<br>(poor responders) | p-value        | Fold change      |
|-------------------|------------------------|------------------------------------------|--------------------------------------|----------------|------------------|
| <b>hsa-miR-21</b> | <b>hsa-miR-21_st</b>   | <b>3.6064885</b>                         | <b>6.0313492</b>                     | <b>0.03212</b> | <b>5.3697715</b> |
| hsa-miR-30e       | hsa-miR-30e_st         | 2.6536443                                | 5.0310321                            | 0.01934        | 5.195951         |
| hsa-miR-27b       | hsa-miR-27b_st         | 6.8020329                                | 9.1736231                            | 0.04205        | 5.1751122        |
| hsa-let-7f        | hsa-let-7f_st          | 4.8014903                                | 6.9690728                            | 0.04636        | 4.4926991        |
| hsa-miR-30b       | hsa-miR-30b_st         | 5.7526193                                | 7.5894909                            | 0.00641        | 3.5723455        |
| hsa-miR-146b-5p   | hsa-miR-146b-5p_st     | 2.4113302                                | 3.8165445                            | 0.03094        | 2.6485713        |
| hsa-miR-424       | hsa-miR-424_st         | 1.2351584                                | 2.4267929                            | 0.00137        | 2.2841136        |
| hsa-miR-342-3p    | hsa-miR-342-3p_st      | 7.5668049                                | 8.7257137                            | 0.00376        | 2.2328849        |
| hsa-miR-19b       | hsa-miR-19b_st         | 8.5367432                                | 9.6881151                            | 0.03997        | 2.2212503        |
| hsa-miR-181a-2    | hsa-miR-181a-2-star_st | 2.2016156                                | 3.2914627                            | 0.03629        | 2.1285148        |
| hsa-miR-100       | hsa-miR-100_st         | 6.1291595                                | 7.2137752                            | 0.00022        | 2.1208105        |
| hsa-miR-34a       | hsa-miR-34a_st         | 7.0529304                                | 8.0591745                            | 0.00124        | 2.0086751        |
| hsa-miR-3148      | hsa-miR-3148_st        | 1.3215369                                | 2.3164508                            | 0.00068        | 1.9929616        |
| hsa-miR-30c       | hsa-miR-30c_st         | 7.7840085                                | 8.7728157                            | 0.0194         | 1.9845436        |
| hsa-miR-29a       | hsa-miR-29a_st         | 7.9136901                                | 8.8254786                            | 0.02347        | 1.8813764        |
| hsa-miR-98        | hsa-miR-98_st          | 1.203545                                 | 1.9928168                            | 0.01171        | 1.728202         |

**Supplemental Table 2:** List of significantly down-regulated miRNAs in the cumulus cell samples of poor responder patients compared to non-poor responders. The miRNAs are listed in descending order based on absolute fold change value.

| miRNA                    | Probe Set                   | log2 expression (non-poor responders) | log2 expression (poor responders) | p-value                  | Fold change              |
|--------------------------|-----------------------------|---------------------------------------|-----------------------------------|--------------------------|--------------------------|
| OP<0BKNQ& , )#           | OP<0BKNQ& , )RPC#           | ""*% ! & ( , &#                       | ! "" - (% -)#                     | , * , ) - % \$#          | Q& ! "" ) - ' #          |
| OP<0BKNQ! & % % #        | OP<0BKNQ! & % % RPC#        | % "" (& & - , (#                      | ( * \$ \$ ) , " ! ' #             | , * , , , ) )#           | Q& ! " ( ( ' ! #         |
| OP<0BKNQ ( ) ' ! #       | OP<0BKNQ ( ) ' ! RPC#       | "" & \$ - ' & "" ' #                  | ! * % ( " & "" ' #                | , * , , " , ' #          | Q& ) * ) ' ! & "" #      |
| OP<0BKNQ& ' , #          | OP<0BKNQ& ' , QPC<DRPC#     | "" , ! , " ( ' #                      | ! * , ' - - ) )#                  | , * , , ( " #            | Q& & * ' & ) \$ #        |
| OP<0BKNQ ( ! ) #         | OP<0BKNQ ( ! ) RPC#         | - & "" \$ ! ! ' & #                   | ) * % ' - ) ! & \$ #              | , * , , ! ( " #          | Q& , * , , % & ( % #     |
| OP<0BKNQ ( \$ % #        | OP<0BKNQ ( \$ % RPC#        | ( % ( ' ' \$ ! \$ #                   | & * ' - & ' % , " #               | , * , , , ( #            | Q \$ "" ( , - & "" #     |
| OP<0BKNQ - - ! \$ #      | OP<0BKNQ - - ! SRPC#        | - * ! % ' % "" ) #                    | ! * & ! ) \$ ) )#                 | , * , & \$ "" ! #        | Q \$ * ' \$ ' , % & ! #  |
| OP<0BKNQ! & % ' #        | OP<0BKNQ! & % ' RPC#        | & & % ' - - ) - #                     | % * \$ "" \$ "" ! & - #           | , * , , ! \$ #           | Q "" ! ( - - \$ "" #     |
| OP<0BKNQ& ) ' 0' J#      | OP<0BKNQ& ) ' 0' JRPC#      | % ) , % \$ ) ) ( #                    | ' * ( , - "" ' ' #                | , * , , , ! \$ #         | Q - * \$ "" ( " ) - #    |
| OP<0BKNQ % % ' 0! J#     | OP<0BKNQ % % ' 0! JRPC#     | - * - ( ) ' ' & ( #                   | ! * \$ ' "" ' ( ! #               | , * , & \$ % ) #         | Q - * ( ! % % ) ! " #    |
| OP<0BKNQ ( " , #         | OP<0BKNQ ( " , RPC#         | & , * \$ ( ( ' & & #                  | % ) "" % ( ) #                    | , * , , , "" #           | Q - * ! ( ' ) & - #      |
| OP<0BKNQ& ! & #          | OP<0BKNQ& ! & RPC#          | % % , \$ , & "" ) #                   | - * & ' % ) - , % #               | , * , ) & "" #           | Q - * ) "" \$ - ( #      |
| OP<0BKNQ ( ! ) "" #      | OP<0BKNQ ( ! ) "" RPC#      | ( ( "" \$ ( ) "" #                    | & * % "" - ' ! % ! #              | , * , , ! ) \$ #         | Q - * , "" , ) & "" #    |
| OP<0BKNQ ( "" ) #        | OP<0BKNQ ( "" ) RPC#        | - % \$ ( - ! \$ ' #                   | ( ) \$ % ( & & % #                | , * , & & ) - #          | Q - * , ( " , ! ! #      |
| OP<0BKNQ& ) - #          | OP<0BKNQ& ) - QPC<DRPC#     | ( "" "" & & , - ! #                   | ) * & - , ) ( & #                 | , * , , ) ) & #          | Q - * , ) ( ' \$ ( % #   |
| OP<0BKNQ \$ ! \$ #       | OP<0BKNQ \$ ! \$ SRPC#      | % ! "" "" "" % #                      | ' * % \$ "" - ( ( #               | , * , , & ( ) #          | Q ' * % ! ( , , ) #      |
| OP<0BKNQ& \$ , \$ #      | OP<0BKNQ& \$ , \$ RPC#      | \$ ) & ) % ( & - #                    | - * - ' & ) % & % #               | , * , , ) \$ ' #         | Q ' * - \$ , ' ' - #     |
| OP<0BKNQ - , ) #         | OP<0BKNQ - , ) RPC#         | - * - "" ( ) % ' \$ #                 | ( "" ) & & ( ) #                  | , * , ) ' & & #          | Q ' * ( " - & ( \$ & #   |
| OP<0BKNQ! & % "" #       | OP<0BKNQ! & % "" RPC#       | - * \$ , ( ! ) \$ #                   | ( * , ( ( ' " #                   | , * , ! ) " ( #          | Q ' * ) "" ) ! ' #       |
| OP<0BKNQ! & - ) #        | OP<0BKNQ! & - ) RPC#        | % , ) ( , & - ( #                     | ' * - ' ! & & , ' #               | , * , & ' , \$ #         | Q ' * & "" ) - ' % ( #   |
| OP<0BKNQ& \$ , \$ #      | OP<0BKNQ& \$ , \$ QPC<DRPC# | ' * ! ) % "" - - #                    | ! * , & ) - - ( #                 | , * , ) & , & #          | Q ( * \$ "" % ) \$ - #   |
| OP<0BKNQ ) % - & #       | OP<0BKNQ ) % - & RPC#       | & ! * ) ( , ! ' #                     | & & * ) \$ ! & \$ #               | , * , , , ) \$ #         | Q ( * - \$ ( , % \$ \$ # |
| OP<0BKNQ \$ ( ! #        | OP<0BKNQ \$ ( ! RPC#        | ! "" , ( & , % #                      | & * ( % ' , ( " #                 | , * , , ! ) \$ #         | Q ( * - ' ! ( ' % - #    |
| OP<0BKNQ! & % , Q&RP#    | OJROP<0BKNQ! & % , Q&RPRPC# | - - & \$ & ( ( \$ #                   | ( * ( ! ' & % ' \$ #              | , * , , - , "" #         | Q ( * ' ( ! \$ % % ) #   |
| OP<0BKNQ - - ' #         | OP<0BKNQ - - ' RPC#         | - "" "" \$ \$ "" ( #                  | ( * "" "" \$ , \$ #               | , * , & ( " ! #          | Q ( * ' ! % , % ! - #    |
| OP<0BKNQ! ( - #          | OP<0BKNQ! ( - RPC#          | ' * - ) , & % #                       | ! * ( \$ , % ) \$ #               | , * , ) ) ' ( #          | Q ( * ! \$ ' \$ \$ & % # |
| OP<0BKNQ ( ) % & #       | OP<0BKNQ ( ) % & RPC#       | & & * ! ( " \$ ) - #                  | \$ ) "" \$ "" ' ) "" #            | , * , , , , ' #          | Q ( * & \$ ! ' ' ! \$ #  |
| OP<0BKNQ& \$ & ' #       | OP<0BKNQ& \$ & ' RPC#       | & ! * - ( \$ ' & #                    | & & * - & % \$ % & #              | , * , , ! \$ \$ #        | Q ( * , % ' ( - #        |
| OJROP<0BKNQ - - ! #      | OJROP<0BKNQ - - ! RIRPC#    | ( % ) "" ) % ! ( #                    | ) * % , "" ! & "" #               | , * , , & ! ! #          | Q ( * , ' ' ( & ! #      |
| OP<0BKNQ& ( \$ #         | OP<0BKNQ& ( \$ QPC<DRPC#    | & ) ! , ) \$ & ( #                    | & , * ! ! \$ % ' ' #              | , * , , , & ) #          | Q ! % \$ % % "" - ( #    |
| OP<0BKNQ& ) , " 0' J#    | OP<0BKNQ& ) , " 0' JRPC#    | & , * ) ( % ! "" ' #                  | % ! , ( % - "" #                  | , * , , ' ( ! #          | Q ! % ( - ! \$ ' ' #     |
| OJROP<0BKNQ! & % , Q)RP# | OJROP<0BKNQ! & % , Q)RPRPC# | ' * ) ) ' , \$ #                      | ! * ) \$ ) % & #                  | , * , & & , ! #          | Q ! % & % & ! " ( #      |
| OP<0BKNQ! & % , Q! J#    | OP<0BKNQ! & % , Q! JRPC#    | % "" "" ' " ) ' - #                   | - * "" "" ! - - ' #               | , * , ! ' ' - #          | Q ! "" "" ! % & % #      |
| OP<0BKNQ& ( - \$ #       | OP<0BKNQ& ( - \$ RPC#       | & ) % ( \$ ) ' ( #                    | & , * \$ ( % \$ & #               | , * , , "" \$ #          | Q ! "" "" ! , ) & ' #    |
| OP<0BKNQ& ) - % #        | OP<0BKNQ& ) - % RPC#        | & , * % "" \$ , - \$ #                | % \$ \$ & - & ( ! #               | , * , , ! , - #          | Q ! * - \$ % \$ & % #    |
| OJROP<0BKNQ! & % ' #     | OJROP<0BKNQ! & % ' RPC#     | ! * \$ , ' \$ ! " #                   | ) * & ' ' & \$ - ( #              | , * , , ! - ( #          | Q ! ' - % - \$ - " #     |
| OJROP<0BKNQ "" ) #       | OJROP<0BKNQ "" ) RPC#       | ( ) & % ' - - ( #                     | ) * ! \$ % ' ' ( % #              | , * , , ) ! "" #         | Q ! ' ' ! , % ( , - #    |
| OJROP<0BKNQ - - ! \$ #   | OJROP<0BKNQ - - ! SRIRPC#   | ( - ) - ! ) "" #                      | ) * % , - ' - ( ! #               | , * , , ) - \$ #         | Q ! ' ' ! , ) ! & ) #    |
| OP<0BKNQ - ! % #         | OP<0BKNQ - ! % RPC#         | & ! * - ( ( \$ ' ( #                  | & & * ! ' , ) ' #                 | , * , , ! - & #          | Q ! ' , - ) , & #        |
| OP<0BKNQ& ) ) #          | OP<0BKNQ& ) ) RPC#          | ( \$ % & "" ) #                       | ! * & "" ( ) \$ - #               | , * , ! ! - #            | Q ! * ( \$ \$ % & "" ( # |
| OP<0BKNQ& ) "" ! = #     | OP<0BKNQ& ) "" ! = RPC#     | ' * ( ) - , ! % "" #                  | ! * - % ) "" - ! ! #              | , * , & ! , & #          | Q ! * ! ( " \$ ( ( #     |
| OJROP<0BKNQ - - ! \$ #   | OJROP<0BKNQ - - ! SRPC#     | ( % ! ) ' ' ' % #                     | ! * , & & , ( \$ ) #              | , * , ( " ! "" ) & , ! # | Q ! * ! ( ! % ( & % #    |
| OJROP<0BKNQ \$ ! ' #     | OJROP<0BKNQ \$ ! ' RPC#     | ( "" "" % \$ % % #                    | ! * , ) "" ( ) % #                | , * , & & ! ) #          | Q ! * ! ) , % - \$ ) #   |

|                                |                                     |                   |                  |                    |                   |
|--------------------------------|-------------------------------------|-------------------|------------------|--------------------|-------------------|
| OP<0BKNQ&)%#                   | OP<0BKNQ&)%#RPC#                    | ""-\$, \$\$&#     | '*\$" (&' (#     | , *, &' \$#        | Q! '!, ' - "' ! # |
| OP<0BKNQ"-)#                   | OP<0BKNQ"-)#RPC#                    | (&)*-%, %&#       | &&*, &' %- '#    | , *, , , -#        | Q! *(&! &' '#     |
| OP<0BKNQ!) -#                  | OJROP<0BKNQ!) -RPC#                 | !"(' !!! -"#      | &*&(\$&)%#       | , *, , -&#         | Q! *(&) &%\$%\$#  |
| OP<0BKNQ! \$-\$ -#             | OP<0BKNQ! \$-\$ -RPC#               | &!*, \$%-)#       | &&*(-, (-#       | , *, , )"'#        | Q! *&&! &\$%\$"#  |
| OP<0BKNQ\$)S#                  | OP<0BKNQ\$)SQPC<DRPC#               | \$*&'(-(' &#      | ""' &(\$%"#      | , *, &(' #         | Q! *, \$-' (&#    |
| OP<0BKNQ! &(&#                 | OP<0BKNQ! &(&RPC#                   | &, *&! &%, )#     | %*, "'&' &-#     | , *, &%"-#         | Q! *, %! -"' ! #  |
| OP<0BKNQ&\$, %#                | OP<0BKNQ&\$, %RPC#                  | (&)*! \$%' "#     | &, ""\$!, \$(#   | , *, , %) (#       | Q! *, (' &, "#&#  |
| OP<0BKNQ&! , "#                | OP<0BKNQ&! , "RPC#                  | %("-%()\$#        | -\$%&\$("!"#     | , *, , %&%#        | Q)*\$%\$%-&#      |
| OP<0BKNQ&), %#                 | OP<0BKNQ&), %RPC#                   | )""&%--%&#        | &*) , -\$%&!#    | , *, &&! '#        | Q)*\$""(' '#      |
| OP<0BKNQ-!"#                   | OP<0BKNQ-!"RPC#                     | (*, ' , -' ! #    | )*(%&' &, (-#    | , *, , )""%#       | Q)*\$' %\$%\$%#   |
| OJROP<0BKNQ! &%, Q! #          | OJROP<0BKNQ! &%, Q! RRPC#           | '%, ""%&%#        | (*)%!"&' #       | , *, , , %&%#      | Q)*""' %%"#       |
| OP<0BKNQ&\$&, #                | OP<0BKNQ&\$&, #RPC#                 | ""&(\$' &)%#      | '*-""', \$%#     | , *, &' &&#        | Q)*""(, -"-#      |
| OJROP<0BKNQ\$ (&Q)RP#          | OJROP<0BKNQ\$ (&Q)RRPC#             | !"(-&--\$%#       | )*, , , !-, "'#  | , *, &-\$ (#       | Q)*""' !' %&! #   |
| OP<0BKNQ--!#                   | OP<0BKNQ--!RPC#                     | &&*\$-\$%&#       | &, *)' "'')\$#   | , *, ! \$!#        | Q)*""&, -"(%#     |
| OP<0BKNQ&\$&! #                | OP<0BKNQ&\$&! #RPC#                 | !"%- , ' , \$#    | )*(\$' )' &&#    | , *, , , , (#      | Q)*'""-)%&#       |
| OP<0BKNQ' \$-\$ -#             | OP<0BKNQ' \$-\$ -RPC#               | !"*, &'!)' '#     | &""&, -\$)!#     | , *, , &#&#        | Q)*(" , ) , \$(#  |
| OP<0BKNQ&\$&#                  | OP<0BKNQ&\$&#QPC<DRPC#              | )*\$)%-\$&\$#     | &*-' , \$"#      | , *, , &&\$#       | Q)*(("%' (#       |
| OP<0BKNQ' "'#                  | OP<0BKNQ' "'RPC#                    | )'') , %(-&#      | &*)-(%"&#        | , *, , !)\$#       | Q)*!%%"' &#       |
| OP<0BKNQ! & ) (#               | OP<0BKNQ! & ) (RPC#                 | '*)&' -)&#        | !"\$-('(&\$#     | , *, (%&' )%- (#   | Q)*!"\$%-(#       |
| OP<0BKNQ)""#                   | OP<0BKNQ)""RPC#                     | '*&%-\$%#         | ( , , , )%"#     | , *, , , -' #      | Q)*""' ""\$!#     |
| Q#                             | >(\$R/3.7 , , , , , ) , --! ! RPCT# | !"&, -%()#        | &\$% , ! &' -#   | , *, &&\$) -%\$%#  | Q)*&-%() \$#      |
| OP<0BKNQ! !"#                  | OP<0BKNQ! !"#QPC<DRPC#              | )*&(""\$(\$       | &*, !-\$%-&#     | , *, &-)"#         | Q)*&' \$--' -#    |
| OP<0BKNQ-' (Q' J#              | OP<0BKNQ-' (Q' JRPC#                | )*&%-()&#         | &*&, !-\$)#      | , *, ! , ) (#      | Q)*&&&&- (#       |
| OJROP<0BKNQ\$ (&Q) #           | OJROP<0BKNQ\$ (&Q) RRPC#            | !"!)' ""\$&#      | )*) , &(%, )#    | , *, , ("\$\$)%\$# | Q)* , (% , !)%#   |
| OP<0BKNQ"- \$Q! J#             | OP<0BKNQ"- \$Q! JRPC#               | )'%"")' -)#       | &""&-)!(#        | , *, , !)\$#       | Q)* , &"%\$!#     |
| OP<0BKNQ(!) &#                 | OP<0BKNQ(!) &RPC#                   | !" , & , !' "\$#  | )*, ' (%--#      | , *, ! ! ! ! #     | Q&\$! \$) &! #    |
| OP<0BKNQ--%#                   | OP<0BKNQ--%RPC#                     | )'!) ("'"\$"#     | &*" , " , " , "# | , *, ! )"-#        | Q&\$! ")%#-#      |
| OJROP<0BKNQ! (-#               | OJROP<0BKNQ! (-RPC#                 | )""' %' &(-#      | &*-&&!)#         | , *, , )%#         | Q&\$&\$! , !)#    |
| OJROP<0BKNQ' - (#              | OJROP<0BKNQ' - (RPC#                | !"&&&! -)"#       | )*)' ( , -\$"#   | , *, &' , %#       | Q&""&&- , "-#     |
| OP<0BKNQ! "%S#                 | OP<0BKNQ! "%SRPC#                   | (&! \$ , (' "#    | !"!) , -)"#      | , *, , " &#        | Q&""-! ("&#       |
| OP<0BKNQ' %\$#                 | OP<0BKNQ' %\$QPC<DRPC#              | )*! -%, ' (\$#    | &""-&%((""       | , *, , , \$!#      | Q&""( %-&&\$#     |
| OP<0BKNQ! &' )#                | OP<0BKNQ! &' )RPC#                  | )*, & , \$ , ' !# | &*) , \$ , % &#  | , *, &-)&#         | Q&""(!)\$&#       |
| OJROP<0BKNQ\$ (&Q) #           | OJROP<0BKNQ\$ (&Q) RRPC#            | )*-\$' ( , %#     | &%"\$"' % , "#   | , *, ! )! )#       | Q&""( , %\$)-#    |
| OP<0BKNQ() - , #               | OP<0BKNQ() - , RPC#                 | )*&("!" , "#      | &*( , )\$%\$'"#  | , *, &(' %#        | Q&"" , -%! &#     |
| OJROP<0BKNQ() \$""#            | OJROP<0BKNQ() \$""RPC#              | &%!"-' &#&#       | &*, -"%)' )#     | , *, , " \$-#      | Q&"" , ' , %' #   |
| OP<0BKNQ\$!' #                 | OP<0BKNQ\$!' #RPC#                  | &\$!)' %&#        | &*&--"'')#       | , *, , (-%\$#      | Q&""-%\$""")#     |
| OJROP<0BKNQ--' #               | OJROP<0BKNQ--' #RPC#                | )*&-&!)' #        | &*(!)! "%%#      | , *, && , \$#      | Q&""-' )"-#       |
| OJROP<0BKNQ' %#                | OJROP<0BKNQ' %RPC#                  | &%%\$' ! \$!#     | &*&""-' ! #      | , *, &(' -#        | Q&""-)-)%#        |
| OJROP<0BKNQ&&%&#               | OJROP<0BKNQ&&%&RPC#                 | )*-%' ")&#        | &*\$%! \$&%%#    | , *, ! ' '(#       | Q&""-)' ! ' #     |
| OP<0BKNQ()%' #                 | OP<0BKNQ()%' #RPC#                  | &' )! , '! #      | , "%'"' && , -#  | , *, &) \$!#       | Q&""--\$')#       |
| OP<0BKNQ' --#                  | OP<0BKNQ' --RPC#                    | &*( ' ' &' ! #    | , "%&&\$ , , -#  | , *, &\$%\$' #     | Q&""-' )! % #     |
| OJROP<0BKNQ-()#                | OJROP<0BKNQ-()RPC#                  | &\$&' ( ' , %#    | &*)' " (\$)&#    | , *, ! -)"#        | Q&""' ! ! &#      |
| OP<0EACQ""LQ;&#O<QPEACQ""LQ) # | OP<0EACQ""LQ;&#QPC<DRPC#            | &%&(&- , )#       | &*\$&""""\$)#    | , *, , ) , --#     | Q&""' ! ! -"%#    |
| OJROP<0BKNQ\$! "#              | OJROP<0BKNQ\$! "#RPC#               | &-(-&&(\$#        | &*, ! \$! ! \$#  | , *, &! (-#        | Q&""' ) ) ) ( (#  |
| OJROP<0BKNQ& ) (#              | OJROP<0BKNQ& ) (RPC#                | ""\$' & \$%\$#    | -"" , ' ! ( ! #  | , *, , ) ! %#      | Q&""' & , &) &! # |

Supplemental Figure 1.

Supplemental Figure 2.
